# Supplementary material
Source: HighWire-hosted journal article supplement (https://bjgpopen.org/highwire/filestream/5728/field_highwire_adjunct_files/0/HG_BJGPO.2022.0104_Supp.pdf)
Supplement: HG_BJGPO.2022.0104_Supp.pdf [file HG_BJGPO.2022.0104_Supp.pdf]

## SUPPLEMENTARY DATA

### Box S1

#### Operational definition of clinical trial and types of studies

Consistent with the World Health Organization (WHO) and the International Committee of Medical Journal Editors (ICMJE) for purposes of registration,<sup>1,2</sup> a clinical trial is defined here as any experimental or interventional study that prospectively assigns subjects (individually or clusters) to an intervention(s), with or without concurrent comparison or control groups, to evaluate the effects on biomedical outcomes (inflammatory biomarkers). The term “prospectively assigns” refers to a pre-defined process specified stipulating the assignment of research subjects to one or more arms of the clinical trial. To be prospectively assigned, there need not be randomisation or a control group. The term “intervention” is defined as a manipulation of the individual’s home built environment (BE) for modifying the health-related endpoint (see Box S2).

Therefore, we will include all types of clinical trials, experimental studies (including randomised and pseudo-randomised, controlled and uncontrolled trials, etc.) We adhere to the Cochrane Handbook,<sup>3</sup> and we refer to non-randomised trials as a quantitative experimental study design in which individuals (or households) are prospectively assigned to an intervention(s) using methods that differ from the randomisation procedure. Randomised controlled trials (RCTs) are prospective, experimental study design involving random allocation of participants to interventions; that includes two-arm parallel, cluster, crossover, stepped-wedge RCTs, etc. The term “controlled” refers to the presence of a concurrent control or comparator group. We will include any clinical trial, regardless of whether the blind method is used or not (e.g., open-label, single-, double-blind, etc.). Mixed-methods studies employing quantitative data will be included if meeting the inclusion criteria.

Observational studies, that means non-experimental or non-interventional studies, including case reports, case series, cross-sectional, case–control, cohort, ecological, etc., will be excluded.<sup>5</sup> Other studies in which the intervention is not manipulated experimentally to change the home built environment (i.e., policy intervention) and provided or assigned by a research team will be excluded.<sup>5</sup> Pilot and feasibility studies of clinical trials will be considered if meeting eligibility criteria.

## References

- 1 World Health Organization. International Standards for Clinical Trial Registries. 2012. Available from <http://apps.who.int/iris/handle/10665/76705> [accessed 25 August 2022].
- 2 Taichman DB, Backus J, Baethge C, et al. Sharing Clinical Trial Data: A Proposal From the International Committee of Medical Journal Editors. *Ann Intern Med* 2016; **164**: 505–6. doi: 10.7326/M15-2928.
- 3 Reeves BC, Deeks JJ, Higgins JP, Shea B, Tugwell P, Wells GA. Including non-randomized studies on intervention effects. In: Higgins JPT, Thomas J, Chandler J, Cumpston M, Li T, Page MJ WV, ed. *Cochrane Handbook for Systematic Reviews of Interventions* version 6.3. (upadated February 2022). Cochrane, 2022. Available from [www.training.cochrane.org/handbook](http://www.training.cochrane.org/handbook) [accessed 25 August 2022].
- 4 Hernandez-Garcia E, Chrysikou E, Kalea AZ. The Interplay between Housing Environmental Attributes and Design Exposures and Psychoneuroimmunology Profile — An Exploratory Review and Analysis Paper in the Cancer Survivors' Mental Health Morbidity Context. *Int J Environ Res Public Health* 2021; **18(20)**: 10891. doi: 10.3390/ijerph182010891.
- 5 de Vocht F, Katikireddi SV, McQuire C, Tilling K, Hickman M, Craig P. Conceptualising natural and quasi experiments in public health. *BMC Med Res Methodol* 2021; **21(1)**: 32. doi: 10.1186/s12874-021-01224-x.

## **Box S2**

### **Home built environment definition and specification for eligibility criteria.**

The umbrella term Home Built Environment and its acronym (H-BE) is used in this study protocol to refer to the BE of homes.

The H-BE as place of usual residency is defined as a housing facility for a person living on their own or with a family group or non-relative members –regardless of the dwelling type, tenure status and housing conditions– for an indefinite period. This broad definition will embrace private dwellings, public housing facilities, sheltered housing, retirement homes and recreated naturalistic home settings.

A residential healthcare facility provides a home-like atmosphere, spaces, and recreational activities, facilitate communal living spaces for long-term care, and provide overnight permanent accommodation. However, these facilities will not be considered in this study as they do not reflect typical domestic microenvironments in terms of resident's behaviour, activity-time-space patterns and spatial configuration. Health care environments which offer rehabilitations interventions in which the patient spent less than 24-hour period or short stays (i.e., day hospitals, day centres) will not be considered as H-BE and will be excluded. The same applies to studies carried out in institutional settings of medium- and long-term residence (i.e., hospitals, prisons). A BE that provides accommodation for a finite period (i.e., college student settings, campus dormitories) will be also excluded.

Studies carried out in experimental settings will be left out as we seek investigations evaluating household environmental conditions in naturalistic home settings. But those conducted in recreated naturalistic settings that simulate a conventional home space(s) will be considered for inclusion. Research carried out across several settings (i.e., college student settings and private homes) will be included if quantitative data is clearly differentiated between the settings.

## **Box S3**

### **Strategy for involvement of non-academic GP and eligibility criteria.**

A group of non-academic, English or Spanish speaking, practising GPs will be actively involved in conducting the screening process for study selection in cooperation with the first reviewer (EHG). Non-academic GPs have showed willingness to participate in research studies if these address topics of high relevance to their daily practice, specially caring for multimorbid patients at home.<sup>6</sup> The effectiveness of H-BE interventions on inflammatory status in community-dwelling adults is a topic of particular interest of GPs for caring patients with long-term and chronic conditions, and consequently, we expect a high level of GP's willingness to participate in this research study.

Involvement of GPs will be sought through different strategies. In a first round, they will be invited to participate through online cancer community and primary care networks. The use of Primary Care Networks has showed the highest recruitment rate (41%) with no financial and human resources, compared with published ads, personal visits in practice and calls.<sup>7</sup> Our involvement activity will be disseminated in regular newsletters and/or social media platforms from different cancer and primary care networks– e.g., Cancer and Primary Care Research International Network (Ca-PRI), Royal College of General Practitioners (RCGP), Doctors.net, Cancer Research UK (CRUK), Spanish Society of Primary Care Physicians (SEMERGEN), Spanish Society of Family and Community Medicine (semFYC), etc. If there is low initial response, we will use snowball sampling methods that are successful used to recruit hard-to-reach subjects in research studies.<sup>8</sup> Initial GPs involved in the first round that meet eligibility criteria will recruit others from their surgeries or social network who also meet the study inclusion criteria. This strategy will be supplemented by a third round, in which a convenience sample of GPs will be first approached and recruited if meeting the eligibility criteria. Primary care settings will be asked to gain permission to mail invitations to their clinician staff.

Once both GPs show their willingness to participate, a cooperation agreement accompanied by further material about the study and involvement activity will be provided. They will be provided with a complete list of the 287 biomarkers and H-BE interventions, including variants and abbreviations. The signed cooperation agreement will be considered as a successful inclusion.

Each GP group member involved in the research will screen no more than 300 titles and abstracts of the total number of identified papers in a first phase, in duplicate with the first reviewer (EHG). Then, they will be asked for supporting the screening process of the remaining studies.

## **Inclusion criteria**

We will include a primary care physician defined as (1) currently practising as a GP, family practitioner or general internist, (2) being able to read, write and understand English language, (3) meeting technical requirements (internet connection), (4) willing to participate in a short session about the H-BE interventions and screening process in Rayyan software, and (5) signed cooperation agreement.

## **Quality control mechanisms into the screening process**

The following mechanisms for quality controls into the screening process conducted by non-experienced GPs will be implemented:

- Before screening begins, GPs will (1) be provided of an abstract screening tool consisting of the set of eligibility criteria organised hierarchically across the PICO question; and (2) conduct a pilot screening 10 abstracts together with the first reviewer (EHG) in a training phase.<sup>9</sup>
- During abstract screening, (3) GPs will be monitored continuously as the agreement rates at individual level are visible in the Rayyan screening software by the first reviewer; this allows determining if any GP with high levels of disagreement (agreement rates < 75%) may require booster training;<sup>9</sup> (4) the text mining function in Rayyan screening tool will successfully assist GP reviewers to identify the relevant studies early in the process.<sup>10</sup>
- After screening ends, (5) a second experienced reviewer will independently be acting as a resolver to screen all records that received discordant assessments between the first reviewer and the crowd of GPs.<sup>11</sup> Following this partial replication of citation-screening task, the remaining disagreements between the first and second reviewers will be resolved by consensus. The same approach will be applied in the full-text article screening.

## References

- 6 Tawo S, Gasser S, Gemperli A, Merlo C, Essig S. General practitioners' willingness to participate in research: A survey in central Switzerland. *PLoS One* 2019; **14(3)**: e0213358. doi: 10.1371/journal.pone.0213358.
- 7 Lech S, O'Sullivan JL, Wellmann L, et al. Recruiting general practitioners and patients with dementia into a cluster randomised controlled trial: strategies, barriers and facilitators. *BMC Med Res Methodol* 2021; **21(1)**: 61. doi: 10.1186/s12874-021-01253-6.
- 8 Valerio MA, Rodriguez N, Winkler P, et al. Comparing two sampling methods to engage hard-to-reach communities in research priority setting. *BMC Med Res Methodol* 2016; **16(1)**: 146. doi: 10.1186/s12874-016-0242-z.
- 9 Polanin JR, Pigott TD, Espelage DL, Grotzinger JK. Best practice guidelines for abstract screening large-evidence systematic reviews and meta-analyses. *Res Synth Methods* 2019; **10(3)**: 330–42. doi: 10.1002/jrsm.1354.
- 10 Olofsson H, Brolund A, Hellberg C, et al. Can abstract screening workload be reduced using text mining? User experiences of the tool Rayyan. *Res Synth Methods* 2017; **8(3)**: 275–80. doi: 10.1002/jrsm.1237.
- 11 Noel-Storr AH, Redmond P, Lamé G, et al. Crowdsourcing citation-screening in a mixed-studies systematic review: a feasibility study. *BMC Med Res Methodol* 2021; **21(1)**: 88. doi: 10.1186/s12874-021-01271-4.

**Table S1****Environmental exposure categories within home built environments.**

| <b>Category</b>        |                            | <b>Terms for environmental attributes<sup>1</sup></b> |                  |
|------------------------|----------------------------|-------------------------------------------------------|------------------|
| Air quality            | Bioaerosols                | Aerosols                                              | Carbon monoxide  |
|                        | Volatile organic compounds | Particulate matter                                    | Nitrogen dioxide |
|                        | Fungi                      | Fine/ultrafine particles                              | Nitrous acid     |
|                        | Mold                       | Formaldehyde                                          | Sulfur dioxide   |
|                        | Ventilation                | Polycyclic aromatic hydrocarbons                      | Ozone            |
|                        | Air-conditioning           | Phthalic acids                                        |                  |
|                        | Air filtration             | High-efficiency particulate air                       |                  |
| Thermal comfort        | Temperature                | Thermal insulation                                    | warmth           |
|                        | Heating                    |                                                       |                  |
| Non-ionising radiation | Natural lighting           | Artificial lighting                                   | Illumination     |
|                        | Daylight                   | Night lighting                                        | Illuminance      |
|                        | Sunlight                   | Light at night                                        | Photoperiod      |
|                        | Electromagnetic fields     | Microwaves                                            | VLF-EMFs         |
|                        | Electric / Magnetic field  | Radiofrequency                                        | ELF-EMFs         |
|                        | Electricity                |                                                       |                  |
| Noise                  | Sound                      | Acoustic                                              | Noise            |
|                        | Soundscape                 |                                                       |                  |
| Nature                 | Green                      | Natural                                               | Houseplant       |
|                        | Greenspace                 | Garden                                                | Vegetation       |
|                        | Blue space                 | Plants                                                |                  |
| Water                  | Drinking water             | Water filtration                                      | Water supply     |
|                        | Water quality              | Water purification                                    |                  |

VLF, very low frequency; ELF, extremely low frequency; EMFs, electromagnetic fields.

<sup>1</sup> A full list of variants terminology, synonyms, alternative topics, or spelling variations for each term is provided by requesting to the corresponding author. These variants are shown in the search strategy (Table S4).

**Table S2****Potential home built environment interventions for improving or modifying quality of household environmental exposure.**

| <i>Environmental attribute</i>                        | <i>Description of some home-built environment interventions<sup>1, 2</sup></i>                                                                                                                                                                                                                                                                                      |
|-------------------------------------------------------|---------------------------------------------------------------------------------------------------------------------------------------------------------------------------------------------------------------------------------------------------------------------------------------------------------------------------------------------------------------------|
| Warmth, indoor air and energy efficiency improvements | Heating installation/repair, electric storage heater, thermal insulation, reproofing, window replacement, provision of ventilation, air filter installations, delivery of portable ventilation devices, use of low volatile organic compound products and materials, provision of elements/devices for air ionisation, improvements for avoiding moisture exposure. |
| Artificial lighting and sunlighting <sup>3</sup>      | Replacement of luminaries, space layout and re-configurations of surface area of window or internal space, terrace, patios. Home-based bright light therapy with devices will be included if these are integrated into domestic luminaries or other built environment elements.                                                                                     |
| Non-ionising radiation <sup>3</sup>                   | Installing protective panels, unplugging devices not in use to reduce field strengths in the home, increasing the distance or changing phase and neutral line (system upgrade), relocation from apartment building with new electric system.                                                                                                                        |
| Noise, soundscape                                     | Installing soundproof windows/panels, acoustic insulation in party walls or building facades to block external noises, ventilation device replacement to mask unwanted sounds, supplying phono-acoustic material, indoor technological systems to release wanted soundscape.                                                                                        |
| Nature                                                | Provision and improvement (e.g., accessibility and/or visibility) of natural elements to individual/community private gardens, incorporating greater number of houseplants, spatial re-design to provide domestic greenspaces, supplying devices to recreate digitally nature views.                                                                                |
| Water                                                 | Installation of sustainable water systems, home treatment devices for production of water with ionisation characteristics and specific potential of hydrogen (pH).                                                                                                                                                                                                  |

<sup>1</sup>The proposed home built environment interventions do not pretend to represent a comprehensive list, but to serve as potential examples.

<sup>2</sup>Those studies where residents were rehoused or received housing refurbishment will be included if enough data about the specific home built environment intervention(s) are available.

<sup>3</sup>Although the artificial and natural lighting belong to the non-ionising radiation group, the former is dealt with separately because of the large number of research studies examining the health effects from these environmental attributes.



**Table S3**  
**Cancer-associated systemic inflammation biomarkers**

| Circulating individual inflammatory markers <sup>1, 2</sup> |                                     |                           |                                                  |    |                                          |
|-------------------------------------------------------------|-------------------------------------|---------------------------|--------------------------------------------------|----|------------------------------------------|
| Group                                                       | [ID <sub>i</sub> -ID <sub>f</sub> ] | ID                        | Single marker                                    | ID | Single marker                            |
| G1-10                                                       | Inflammatory mediators              |                           |                                                  |    |                                          |
| G1                                                          | [1-99]                              | Cytokines                 |                                                  |    |                                          |
|                                                             | [1-41]                              | Interleukins              |                                                  |    |                                          |
|                                                             | [1-9]                               | Interleukin-1 family      |                                                  |    |                                          |
|                                                             |                                     | 1                         | Interleukin-1 alpha                              | 6  | Interleukin-36 gamma                     |
|                                                             |                                     | 2                         | Interleukin-1 beta                               | 7  | Interleukin-36 alpha                     |
|                                                             |                                     | 3                         | Interleukin-1Ra                                  | 8  | Interleukin-37                           |
|                                                             |                                     | 4                         | Interleukin-18                                   | 9  | Interleukin-38                           |
|                                                             |                                     | 5                         | Interleukin-33                                   |    |                                          |
|                                                             | [10-15]                             | Interleukin-2 family      |                                                  |    |                                          |
|                                                             |                                     | 10                        | Interleukin-2                                    | 13 | Interleukin-9                            |
|                                                             |                                     | 11                        | Interleukin-4                                    | 14 | Interleukin-15                           |
|                                                             |                                     | 12                        | Interleukin-7                                    | 15 | Interleukin-21                           |
|                                                             | [16-24]                             | Interleukin-6 family      |                                                  |    |                                          |
|                                                             |                                     | 16                        | Interleukin-6                                    | 21 | Cardiotrophin-like cytokine factor 1     |
|                                                             |                                     | 17                        | Interleukin-11                                   | 22 | Ciliary neurotrophic factor              |
|                                                             |                                     | 18                        | Leukemia inhibitory factor                       | 23 | Neuropoietin                             |
|                                                             |                                     | 19                        | Oncostatin                                       | 24 | Interleukin-31                           |
|                                                             |                                     | 20                        | Cardiotrophin-1                                  |    |                                          |
|                                                             | [25-31]                             | Interleukin-10 family     |                                                  |    |                                          |
|                                                             |                                     | 25                        | Interleukin-10                                   | 29 | Interleukin-24                           |
|                                                             |                                     | 26                        | Interleukin-19                                   | 30 | Interleukin-26                           |
|                                                             |                                     | 27                        | Interleukin-20                                   | 31 | Interleukin-29                           |
|                                                             |                                     | 28                        | Interleukin-22                                   |    |                                          |
|                                                             | [32-35]                             | Interleukin-12 family     |                                                  |    |                                          |
|                                                             |                                     | 32                        | Interleukin-12                                   | 34 | Interleukin-27                           |
|                                                             |                                     | 33                        | Interleukin-23                                   | 35 | Interleukin-35                           |
|                                                             | [36]                                | 36                        | Interleukin-13                                   |    |                                          |
|                                                             | [37, 38]                            | 37                        | Interleukin-17                                   | 38 | Interleukin-25 (/-17E)                   |
|                                                             | [39, 40]                            | 39                        | Interleukin-32                                   | 40 | Interleukin-32 gamma                     |
|                                                             | [41]                                | 41                        | Interleukin-34                                   |    |                                          |
|                                                             | [42-46]                             | Colony-stimulating factor |                                                  |    |                                          |
|                                                             |                                     | 42                        | Granulocyte colony stimulating factor            | 45 | Multipotential colony stimulating factor |
|                                                             |                                     | 43                        | Granulocyte-macrophage colony stimulating factor |    | Interleukin-3                            |
|                                                             |                                     | 44                        | Macrophage colony stimulating factor             | 46 | Erythropoietin<br>Hematopoietin          |
|                                                             | [47-50]                             | Adipokines                |                                                  |    |                                          |
|                                                             |                                     | 47                        | Adiponectin                                      | 49 | Resistin                                 |
|                                                             |                                     | 48                        | Leptin                                           | 50 | Visfatin                                 |
|                                                             | [51-86]                             | Chemokines                |                                                  |    |                                          |
|                                                             |                                     | CC family                 |                                                  |    |                                          |
|                                                             | [51-58]                             | CC Receptors              |                                                  |    |                                          |
|                                                             |                                     | 51                        | CC Receptor 1                                    | 55 | CC Receptor 6                            |
|                                                             |                                     | 52                        | CC Receptor 2                                    | 56 | CC Receptor 7                            |
|                                                             |                                     | 53                        | CC Receptor 4                                    | 57 | CC Receptor 9                            |
|                                                             |                                     | 54                        | CC Receptor 5                                    | 58 | CC Receptor 10                           |
|                                                             | [59-73]                             | CC Ligand                 |                                                  |    |                                          |
|                                                             |                                     | 59                        | CC Ligand 2                                      | 66 | CC Ligand 19                             |
|                                                             |                                     | 60                        | CC Ligand 3                                      | 67 | CC Ligand 20                             |
|                                                             |                                     | 61                        | CC Ligand 4                                      | 68 | CC Ligand 21                             |
|                                                             |                                     | 62                        | CC Ligand 5                                      | 69 | CC Ligand 22                             |
|                                                             |                                     |                           | RANTES                                           | 70 | CC Ligand 24                             |
|                                                             |                                     | 63                        | CC Ligand 7                                      | 71 | CC Ligand 25                             |

|          |            |                                              |                                               |     |                                               |
|----------|------------|----------------------------------------------|-----------------------------------------------|-----|-----------------------------------------------|
|          |            | 64                                           | CC Ligand 8                                   | 72  | CC Ligand 27                                  |
|          |            | 65                                           | CC Ligand 18                                  | 73  | CC Ligand 28                                  |
|          |            | CXC family                                   |                                               |     |                                               |
| [74-79]  |            | CXC Receptors                                |                                               |     |                                               |
|          |            | 74                                           | CXC Receptor 1                                | 77  | CXC Receptor 4                                |
|          |            | 75                                           | CXC Receptor 2                                | 78  | CXC Receptor 6                                |
|          |            | 76                                           | CXC Receptor 3                                | 79  | CXC Receptor 7                                |
| [80-92]  |            | CXC Ligand                                   |                                               |     |                                               |
|          |            | 80                                           | CXC Ligand 1                                  | 87  | CXC Ligand 9                                  |
|          |            | 81                                           | CXC Ligand 2                                  | 88  | CXC Ligand 10                                 |
|          |            | 82                                           | CXC Ligand 3                                  | 89  | CXC Ligand 11                                 |
|          |            | 83                                           | CXC Ligand 4                                  | 90  | CXC Ligand 12                                 |
|          |            | 84                                           | CXC Ligand 5                                  | 91  | CXC Ligand 14                                 |
|          |            | 85                                           | CXC Ligand 6                                  | 92  | CXC Ligand 16                                 |
|          |            | 86                                           | Interleukin-8                                 |     |                                               |
|          |            |                                              | CXC Ligand 8                                  |     |                                               |
| [93-95]  |            | Interferons                                  |                                               |     |                                               |
|          |            | 93                                           | Interferon gamma                              | 95  | Interferon alpha                              |
|          |            | 94                                           | Interferon beta                               |     |                                               |
| [96-98]  |            | Tumor necrosis factor                        |                                               |     |                                               |
| [96]     |            | 96                                           | Tumor necrosis factor alpha                   |     |                                               |
| [97, 98] |            | Tumor necrosis factor receptor               |                                               |     |                                               |
|          |            | 97                                           | Tumor necrosis factor receptor 1              | 98  | Tumor necrosis factor receptor 2              |
| [99]     |            | 99                                           | Macrophage migration inhibitory factor        |     |                                               |
| G2       | [100-129]  | Growth factors                               |                                               |     |                                               |
|          | [100]      | 100                                          | Transforming growth factor-beta               |     |                                               |
|          | [101-103]  | Vascular endothelial growth factor           |                                               |     |                                               |
|          |            | 101                                          | Vascular endothelial growth factor            |     |                                               |
|          | [102,104]  | Vascular endothelial growth factor receptors |                                               |     |                                               |
|          |            | 102                                          | Vascular endothelial growth factor receptor 1 | 104 | Vascular endothelial growth factor receptor 3 |
|          |            | 103                                          | Vascular endothelial growth factor receptor 2 |     |                                               |
|          | [105]      | 105                                          | Platelet-derived growth factor                |     |                                               |
|          | [106-108]  | Fibroblast growth factor                     |                                               |     |                                               |
|          |            | 106                                          | Fibroblast growth factor 1                    | 108 | Fibroblast growth factor receptor             |
|          |            | 107                                          | Basic fibroblast growth factor                |     |                                               |
|          | [109, 110] | Epidermal growth factor                      |                                               |     |                                               |
|          |            | 109                                          | Epidermal growth factor                       | 110 | Epidermal growth factor receptor              |
|          | [111]      | 111                                          | Placental growth factor                       |     |                                               |
|          | [112]      | 112                                          | Hepatocyte growth factor                      |     |                                               |
|          | [113]      | 113                                          | Nerve growth factor                           |     |                                               |
|          | [114, 115] | Insulin                                      |                                               |     |                                               |
|          |            | 114                                          | Insulin                                       | 115 | Insulin-like growth factor                    |
|          | [116-118]  | Endothelins                                  |                                               |     |                                               |
|          |            | 116                                          | Endothelin 1                                  | 118 | Endothelin 3                                  |
|          |            | 117                                          | Endothelin 2                                  |     |                                               |
|          | [119, 120] | Renin-angiotensin system                     |                                               |     |                                               |
|          |            | 119                                          | Angiotensin 1                                 | 120 | Angiotensin 2                                 |
|          | [121, 122] | Angiopoietins                                |                                               |     |                                               |
|          |            | 121                                          | Angiopoietin 1                                | 122 | Angiopoietin 2                                |
|          | [123-129]  | Angiopoietin-like protein family             |                                               |     |                                               |
|          |            | 123                                          | Angiopoietin-like protein 1                   | 128 | Angiopoietin related growth factor            |
|          |            | 124                                          | Angiopoietin-like protein 2                   |     | Angiopoietin-like protein 6                   |
|          |            | 125                                          | Angiopoietin-like protein 3                   | 129 | Cornea-derived transcript 6                   |
|          |            | 126                                          | Angiopoietin-like protein 4                   |     | Angiopoietin-like protein 7                   |
|          |            | 127                                          | Angiopoietin-like protein 5                   |     |                                               |
| G3       | [130-141]  | Transcription factor family                  |                                               |     |                                               |
|          | [130]      | 130                                          | Nuclear factor kappa-B                        |     |                                               |
|          | [131, 132] | Nuclear factor erythroid-2 related factor    |                                               |     |                                               |

|    |            |                                                    |                                                                    |     |                                                                    |
|----|------------|----------------------------------------------------|--------------------------------------------------------------------|-----|--------------------------------------------------------------------|
|    |            | 131                                                | Nuclear factor erythroid-2 related factor 1                        | 132 | Nuclear factor erythroid-2 related factor 2                        |
|    | [133-138]  | Signal transducers and activators of transcription |                                                                    |     |                                                                    |
|    |            | 133                                                | phosphorylated- Signal transducer and activator of transcription 1 | 136 | phosphorylated- Signal transducer and activator of transcription 4 |
|    |            | 134                                                | phosphorylated- Signal transducer and activator of transcription 2 | 137 | phosphorylated- Signal transducer and activator of transcription 5 |
|    |            | 135                                                | phosphorylated- Signal transducer and activator of transcription 3 | 138 | phosphorylated- Signal transducer and activator of transcription 6 |
|    | [139-141]  | Hypoxia-inducible factors                          |                                                                    |     |                                                                    |
|    |            | 139                                                | Hypoxia-inducible factor-1 alpha                                   | 141 | Hypoxia-inducible factor-2α                                        |
|    |            | 140                                                | Hypoxia-inducible factor-1β                                        |     |                                                                    |
| G4 | [142-152]  | Immunoglobulins. <i>Gamma globulins</i>            |                                                                    |     |                                                                    |
|    | [142-148]  | Cell-adhesion molecules                            |                                                                    |     |                                                                    |
|    |            | 142                                                | Intercellular cell-adhesion molecules                              | 145 | Epithelial cell-adhesion molecules                                 |
|    |            | 143                                                | Vascular cell-adhesion molecules                                   | 146 | Neural cell-adhesion molecules                                     |
|    |            | 144                                                | Platelet endothelial cell-adhesion molecules                       |     |                                                                    |
|    | [147-149]  | Selectin family                                    |                                                                    |     |                                                                    |
|    |            | 147                                                | E-selectin                                                         | 148 | P-selectin                                                         |
|    |            |                                                    | Endothelial-leukocyte adhesion molecule 1                          | 149 | L-selectin                                                         |
|    |            |                                                    | Leukocyte-endothelial cell adhesion molecule 2                     |     |                                                                    |
|    | [150-152]  | Programmed cell death protein                      |                                                                    |     |                                                                    |
|    | [150]      | 150                                                | Programmed cell death protein 1                                    |     |                                                                    |
|    | [151, 152] | Programmed cell death protein ligand               |                                                                    |     |                                                                    |
|    |            | 151                                                | Programmed cell death protein ligand 1                             | 152 | Programmed cell death protein ligand 2                             |
| G5 | [153-165]  | Eicosanoids                                        |                                                                    |     |                                                                    |
|    | [153-159]  | Cyclooxygenase pathways                            |                                                                    |     |                                                                    |
|    | [153, 154] | Cyclooxygenases                                    |                                                                    |     |                                                                    |
|    |            | 153                                                | Cyclooxygenase 1<br>Prostaglandin-endoperoxide synthase 1          | 154 | Cyclooxygenase 2<br>Prostaglandin-endoperoxide synthase 2          |
|    | [155-158]  | Prostaglandins                                     |                                                                    |     |                                                                    |
|    |            | 155                                                | Prostaglandin D2                                                   | 158 | Prostaglandin I2                                                   |
|    |            | 156                                                | Prostaglandin E2                                                   |     | Prostacyclin                                                       |
|    |            | 157                                                | Prostaglandin F2 alpha                                             |     |                                                                    |
|    | [159]      | Tromboxanes                                        |                                                                    |     |                                                                    |
|    |            | 159                                                | Tromboxane A2                                                      |     |                                                                    |
|    | [160-165]  | Lipoxygenase pathways                              |                                                                    |     |                                                                    |
|    |            | Lipoxygenases                                      |                                                                    |     |                                                                    |
|    | [160]      | 160                                                | 5-lipoxygenase                                                     |     |                                                                    |
|    | [161-164]  | Leukotrienes                                       |                                                                    |     |                                                                    |
|    |            | 161                                                | Leukotriene A4                                                     | 163 | Leukotriene C4                                                     |
|    |            | 162                                                | Leukotriene B4                                                     | 164 | Leukotriene D4                                                     |
|    | [165]      | Lipoxines                                          |                                                                    |     |                                                                    |
|    |            | 165                                                | Lipoxine A4                                                        |     |                                                                    |
| G6 | [166-209]  | Acute phase proteins                               |                                                                    |     |                                                                    |
|    | [166-205]  | Up-regulation                                      |                                                                    |     |                                                                    |
|    | [166-172]  | Pentraxins family                                  |                                                                    |     |                                                                    |
|    | [166-168]  | C-reactive protein                                 |                                                                    |     |                                                                    |
|    |            | 166                                                | C-reactive protein<br><i>Beta globulin</i>                         | 168 | Monomeric c-reactive protein<br>Modified c-reactive protein        |
|    |            | 167                                                | Pentameric c-reactive protein<br>Native c-reactive protein         |     |                                                                    |

|    |            |                                          |                                        |
|----|------------|------------------------------------------|----------------------------------------|
|    | [169-172]  | Pentraxins                               |                                        |
|    | 169        | Pentraxin-3                              |                                        |
|    | [170,171]  | Neuronal pentraxin                       |                                        |
|    | 170        | Neuronal pentraxin 1                     | 171 Neuronal pentraxin 2               |
|    | [172]      | 172 Serum amyloid P                      |                                        |
|    | [173-175]  | Serum amyloid A                          |                                        |
|    | 173        | Serum amyloid A1                         | 175 Serum amyloid A3                   |
|    | 174        | Serum amyloid A2                         | <i>Beta globulin</i>                   |
|    | [176-178]  | Alpha 1 globulins                        |                                        |
|    | [176,177]  | Alpha 1 acid-glycoprotein                |                                        |
|    | 176        | Orosomucoid 1                            | 177 Orosomucoid 2                      |
|    |            | Alpha 1 acid-glycoprotein 1              | Alpha 1 acid-glycoprotein 2            |
|    | [178]      | 178 Alpha 1 antitrypsin                  |                                        |
|    | [179-184]  | Extracellular matrix proteins            |                                        |
|    | 179        | Fibronectin                              | 183 Vitronectin                        |
|    | 180        | Ferritin (L-ferritin, H-ferritin)        | 184 Lipopolysaccharide binding protein |
|    | 181        | H-ferritin                               |                                        |
|    | 182        | Osteopontin                              |                                        |
|    |            | Early T lymphocyte activation gene 1     |                                        |
|    | [185-195]  | Coagulation and fibrinolytic system      |                                        |
|    | [185-187]  | 185 Fibrinogen                           | 187 Thrombin                           |
|    |            | 186 D-dimer                              |                                        |
|    | [188-195]  | Plasminogen activation system            |                                        |
|    | 188        | Plasmin                                  | 192 Plasminogen activator inhibitory-1 |
|    | 189        | Plasminogen                              | 193 Plasminogen activator inhibitory-2 |
|    | 190        | Urokinase-plasminogen activator          | 194 Neuroserpin                        |
|    | 191        | Urokinase-plasminogen activator receptor | 195 Tissue-type plasminogen activator  |
|    | [196-197]  | Microglobulins                           |                                        |
|    | 196        | Beta 2 microglobulin                     | 197 Alpha 1 microglobulin              |
|    | [198-201]  | Transport proteins                       |                                        |
|    | 198        | Ceruloplasmin                            | 200 Hemopexin                          |
|    | 199        | Haptoglobin                              | 201 Alpha 2 macroglobulin              |
|    |            | <i>Alpha 2 globulin</i>                  | <i>Alpha 2 globulin</i>                |
|    | [202-205]  | Complement system                        |                                        |
|    | [202, 203] | Complement 3                             |                                        |
|    | 202        | Complement 3a                            | 203 Complement 3b                      |
|    | [204,205]  | Complement 5                             |                                        |
|    | 204        | Complement 5a                            | 205 Complement 5b-9                    |
|    | [206-209]  | Down-regulation                          |                                        |
|    | [206, 207] | 206 Pre-albumin                          | 207 Albumin                            |
|    |            | Transthyretin                            |                                        |
|    | [208, 209] | Transferrin                              |                                        |
|    | 208        | Transferrin receptor 1                   | 209 Transferrin receptor 2             |
|    |            | <i>Beta globulin</i>                     | <i>Beta globulin</i>                   |
| G7 | [210-225]  | Matrix metalloproteinases                |                                        |
|    | 210        | Matrix metalloprotenase 1                | 218 Matrix metalloprotenase 12         |
|    | 211        | Matrix metalloprotenase 2                | 219 Matrix metalloprotenase 13         |
|    | 212        | Matrix metalloprotenase 3                | 220 Matrix metalloprotenase 14         |
|    | 213        | Matrix metalloprotenase 7                | 221 Matrix metalloprotenase 16         |
|    | 214        | Matrix metalloprotenase 8                | 222 Matrix metalloprotenase 17         |
|    | 215        | Matrix metalloprotenase 9                | 223 Matrix metalloprotenase 19         |
|    | 216        | Matrix metalloprotenase 10               | 224 Matrix metalloprotenase 26         |
|    | 217        | Matrix metalloprotenase 11               | 225 Matrix metalloprotenase 28         |
| G8 | [226-235]  | Redox active mediators                   |                                        |
|    | [226,227]  | Metalloproteins                          |                                        |
|    | 226        | Hemoglobin                               | 227 Cell-free heme                     |
|    |            | Cell-free hemoglobin                     |                                        |
|    | [228-233]  | Vitamin D                                |                                        |

|                                                                        |                                     |                                               |                                               |                 |                                                      |
|------------------------------------------------------------------------|-------------------------------------|-----------------------------------------------|-----------------------------------------------|-----------------|------------------------------------------------------|
|                                                                        |                                     | 228                                           | 25-hydroxyvitamin D                           | 231             | hydroxycholecalciferol                               |
|                                                                        |                                     | 229                                           | 25-hydroxyvitamin D3 1-alpha-hydroxylase      | 232             | Calcidiol, 25-hydroxyvitamin D <sub>3</sub>          |
|                                                                        |                                     | 230                                           | 25-hydroxyvitamin D3 1- $\alpha$ -hydroxylase | 233             | Calcitriol, 1,25-dihydroxyvitamin D <sub>3</sub>     |
|                                                                        | [234-235]                           | Melatonin                                     |                                               |                 |                                                      |
| G9                                                                     | [236-242]                           | 234                                           | Melatonin                                     | 235             | 6-sulfatoxymelatonin                                 |
|                                                                        |                                     | Lipoproteins                                  |                                               |                 |                                                      |
|                                                                        |                                     | 236                                           | Very low density lipoprotein                  | 240             | Apolipoprotein                                       |
|                                                                        |                                     | 237                                           | Low density lipoprotein                       | 241             | Total cholesterol                                    |
|                                                                        |                                     | 238                                           | High density lipoprotein                      | 242             | Triglycerides                                        |
|                                                                        |                                     | 239                                           | Oxidized low density lipoprotein              |                 |                                                      |
| G10                                                                    | [243-252]                           | Adrenal cortex hormones and neurotransmitters |                                               |                 |                                                      |
|                                                                        |                                     | Glucocorticoids                               |                                               |                 |                                                      |
|                                                                        |                                     | 243                                           | Cortisone                                     | 244             | Cortisol                                             |
|                                                                        |                                     | 245                                           | Corticotropin-releasing hormone               | 248             | Serotonin                                            |
|                                                                        |                                     | 246                                           | Adrenocorticotrophic hormone                  | 249             | 5-hydroxytryptamine                                  |
|                                                                        |                                     | 247                                           | Gamma aminobutyric acid                       |                 |                                                      |
|                                                                        |                                     | Catecholamines                                |                                               |                 |                                                      |
|                                                                        |                                     | 250                                           | Epinephrine, adrenaline                       | 252             | Dopamine                                             |
|                                                                        |                                     | 251                                           | Norepinephrine                                |                 |                                                      |
| G11-13                                                                 | [253-264]                           | Inflammatory effector cells                   |                                               |                 |                                                      |
| G11                                                                    | [253]                               | Platelets parameters                          |                                               |                 |                                                      |
|                                                                        |                                     | 253                                           | Platelets                                     |                 |                                                      |
|                                                                        |                                     |                                               | Platelet count                                |                 |                                                      |
| G12                                                                    | [254-257]                           | Erythrocytes parameters                       |                                               |                 |                                                      |
|                                                                        |                                     | 254                                           | Red blood cell count                          | 256             | Erythrocyte sedimentation rate*                      |
|                                                                        |                                     | 255                                           | Red blood cell distribution width*            | 257             | Plasma viscosity                                     |
| G13                                                                    | [258-264]                           | Leukocytes                                    |                                               |                 |                                                      |
|                                                                        | [258-260]                           | 258                                           | White blood cell count                        | 260             | Neutrophil count                                     |
|                                                                        |                                     | 259                                           | Monocyte count                                |                 |                                                      |
|                                                                        |                                     |                                               | Macrophages                                   |                 |                                                      |
|                                                                        | [261-264]                           | 261                                           | Total lymphocyte count                        | 263             | Regulatory T lymphocytes                             |
|                                                                        |                                     | 262                                           | Absolute lymphocyte count                     | 264             | Circulating plasma cells                             |
| Combining multiple inflammatory markers (into a score) <sup>1, 2</sup> |                                     |                                               |                                               |                 |                                                      |
| Group                                                                  | [ID <sub>i</sub> -ID <sub>j</sub> ] | ID                                            | Multiple markers                              | ID              | [calculated]<br>Combined single and/or multi-markers |
| cG11.13                                                                | [265-271]                           | Leukocytes-platelets parameters               |                                               |                 |                                                      |
|                                                                        | [265-267]                           | Classical scores                              |                                               |                 |                                                      |
|                                                                        |                                     | 265                                           | Lymphocyte-to-monocyte ratio                  | [259:261]       |                                                      |
|                                                                        |                                     |                                               |                                               | 259             | Monocyte count                                       |
|                                                                        |                                     |                                               |                                               | 261             | Total lymphocyte count                               |
|                                                                        |                                     | 266                                           | Neutrophil-to-lymphocyte ratio                | [260:261]       |                                                      |
|                                                                        |                                     |                                               |                                               | 260             | Neutrophil count                                     |
|                                                                        |                                     |                                               |                                               | 261             | Total lymphocyte count                               |
|                                                                        |                                     | 267                                           | Platelet-to-lymphocyte ratio                  | [253:261]       |                                                      |
|                                                                        |                                     |                                               |                                               | 253             | Platelet count                                       |
|                                                                        |                                     |                                               |                                               | 261             | Total lymphocyte count                               |
|                                                                        | [268-271]                           | Novel combining scores <sup>3</sup>           |                                               |                 |                                                      |
|                                                                        |                                     | 268                                           | Derived neutrophil-to-lymphocyte ratio        | [260:(258-262)] |                                                      |
|                                                                        |                                     |                                               |                                               | 258             | White blood cell count                               |
|                                                                        |                                     |                                               |                                               | 260             | Neutrophil count                                     |
|                                                                        |                                     |                                               |                                               | 262             | Absolute lymphocyte count                            |
|                                                                        |                                     | 269                                           | Systemic immune-inflammation index            | [253x260:261]   |                                                      |
|                                                                        |                                     |                                               |                                               | 253             | Platelet count                                       |
|                                                                        |                                     |                                               |                                               | 260             | Neutrophil count                                     |

|        |                                                                  |                                                                         |     |                                                            |
|--------|------------------------------------------------------------------|-------------------------------------------------------------------------|-----|------------------------------------------------------------|
|        |                                                                  |                                                                         | 261 | Total lymphocyte count                                     |
| 270    | Combination of platelet count and neutrophil-to-lymphocyte ratio |                                                                         | 253 | [253; (260:261)]                                           |
|        |                                                                  |                                                                         | 260 | Platelet count                                             |
|        |                                                                  |                                                                         | 261 | Neutrophil count and Total lymphocyte count                |
| 271    | Combined neutrophil/platelet/lymphocyte / differentiation score  |                                                                         |     | [tumor differentiation score x (260:261)-(253:261) score)] |
|        |                                                                  |                                                                         | 253 | Platelet count                                             |
|        |                                                                  |                                                                         | 260 | Neutrophil count                                           |
|        |                                                                  |                                                                         | 261 | Total lymphocyte count                                     |
| cG6    | [272-279]                                                        | Acute phase proteins, combinations                                      |     |                                                            |
|        | [272-275]                                                        | Classical scores                                                        |     |                                                            |
|        | 272                                                              | Glasgow prognostic score                                                |     | [165;206]                                                  |
|        |                                                                  |                                                                         | 165 | C-reactive protein                                         |
|        |                                                                  |                                                                         | 206 | Albumin                                                    |
|        | 273                                                              | Modified glasgow prognostic score                                       |     | [165;206]                                                  |
|        |                                                                  |                                                                         | 165 | C-reactive protein                                         |
|        |                                                                  |                                                                         | 206 | Albumin                                                    |
|        | 274                                                              | Glasgow prognostic score:modified glasgow prognostic score              |     | [165;206]                                                  |
|        |                                                                  |                                                                         | 165 | C-reactive protein                                         |
|        |                                                                  |                                                                         | 206 | Albumin                                                    |
|        | 275                                                              | Prognostic inflammatory and nutritional index                           |     | [165x(175,176)x206x205]                                    |
|        |                                                                  |                                                                         | 165 | C-reactive protein                                         |
|        |                                                                  |                                                                         | 175 | Alpha 1 acid-glycoprotein                                  |
|        |                                                                  |                                                                         | 176 | Alpha 1 acid-glycoprotein                                  |
|        |                                                                  |                                                                         | 205 | Transthyretin                                              |
|        |                                                                  |                                                                         | 206 | Albumin                                                    |
|        | [276-279]                                                        | Novel combined scoring system <sup>3</sup>                              |     |                                                            |
|        | 276                                                              | C-reactive protein-to-albumin ratio                                     |     | [165:206]                                                  |
|        |                                                                  |                                                                         | 165 | C-reactive protein                                         |
|        |                                                                  |                                                                         | 206 | Albumin                                                    |
|        | 277                                                              | Pre-albumin-to-C-reactive protein prognostic score                      |     | [205:165]                                                  |
|        |                                                                  |                                                                         | 165 | C-reactive protein                                         |
|        |                                                                  |                                                                         | 205 | Pre-albumin                                                |
|        | 278                                                              | Albumin-to-globulin ratio                                               |     | [206:globulins (total proteins-206)]                       |
|        |                                                                  |                                                                         | 206 | Albumin                                                    |
|        |                                                                  |                                                                         |     | Globulins. Alpha 1, alpha 2, beta and gamma globulins      |
|        | 279                                                              | Inflammation based index                                                |     | [(253x260):261]                                            |
|        |                                                                  |                                                                         | 253 | Platelet count                                             |
|        |                                                                  |                                                                         | 260 | Neutrophil count                                           |
|        |                                                                  |                                                                         | 261 | Total lymphocyte count                                     |
| cG11.6 | [280-284]                                                        | Leukocytes-acute phase proteins, combinations <sup>3</sup>              |     |                                                            |
|        | 280                                                              | c-reactive protein and neutrophil-lymphocyte ratio score                |     | [165;(260:261)]                                            |
|        |                                                                  |                                                                         | 165 | C-reactive protein                                         |
|        |                                                                  |                                                                         | 260 | Neutrophil count                                           |
|        |                                                                  |                                                                         | 261 | Total lymphocyte count                                     |
|        | 281                                                              | Derived neutrophil-lymphocyte ratio and prognostic nutritional index    |     | [260:(258-262);206+0.005x261]                              |
|        |                                                                  |                                                                         | 206 | Albumin                                                    |
|        |                                                                  |                                                                         | 258 | White blood cell count                                     |
|        |                                                                  |                                                                         | 260 | Neutrophil count                                           |
|        |                                                                  |                                                                         | 261 | Total lymphocyte count                                     |
|        |                                                                  |                                                                         | 262 | Absolute lymphocyte count                                  |
|        | 282                                                              | Combination of neutrophil-lymphocyte ratio and glasgow prognostic score |     | [(260:261); 165, 206]                                      |
|        |                                                                  |                                                                         | 165 | C-reactive protein                                         |
|        |                                                                  |                                                                         | 206 | Albumin                                                    |
|        |                                                                  |                                                                         | 260 | Neutrophil count                                           |
|        |                                                                  |                                                                         | 261 | Total lymphocyte count                                     |
|        | 283                                                              | Combination of fibrinogen and neutrophil-lymphocyte ratio               |     | [184; (260:261)]                                           |
|        |                                                                  |                                                                         | 184 | Fibrinogen                                                 |
|        |                                                                  |                                                                         | 260 | Neutrophil count                                           |

|          |                                                       |                                                                                   |                                        |
|----------|-------------------------------------------------------|-----------------------------------------------------------------------------------|----------------------------------------|
|          |                                                       | 261                                                                               | Total lymphocyte count                 |
| 284      | Inflammation-based cumulative prognostic score system | [165;206;(259:261);(260:261);(253:258);184]                                       |                                        |
|          |                                                       | 165                                                                               | C-reactive protein                     |
|          |                                                       | 184                                                                               | Fibrinogen                             |
|          |                                                       | 206                                                                               | Albumin                                |
|          |                                                       | 253                                                                               | Platelet count                         |
|          |                                                       | 259                                                                               | Monocyte count                         |
|          |                                                       | 260                                                                               | Neutrophil count                       |
|          |                                                       | 261                                                                               | Total lymphocyte count                 |
| cG11.6.8 | [285]                                                 | Leukocytes-acute phase proteins-redox active mediators, combinations <sup>3</sup> |                                        |
|          | 285                                                   | Combined hemoglobin, albumin, lymphocyte, platelet                                | [206x225x253x261]                      |
|          |                                                       | 206                                                                               | Albumin                                |
|          |                                                       | 225                                                                               | Hemoglobin                             |
|          |                                                       | 253                                                                               | Platelet count                         |
|          |                                                       | 261                                                                               | Total lymphocyte count                 |
| cG9.6    | [286]                                                 | Lipoprotein particle-derived measure of insulin resistance                        |                                        |
|          | 286                                                   | Lipoprotein insulin resistance score                                              | [L235sz+L235p+237sz+237p+S236sz+S236p] |
|          |                                                       | 235                                                                               | Very low-density lipoprotein           |
|          |                                                       | 236                                                                               | Low-density lipoprotein                |
|          |                                                       | 237                                                                               | High-density lipoprotein               |
|          | 287                                                   | AC score                                                                          | [165;240]                              |
|          |                                                       | 240                                                                               | Apolipoprotein A-1                     |
|          |                                                       | 165                                                                               | C-reactive protein                     |

G, group; cG, combined group; ID, identifier; L, large; P, particle concentration; S, small; Sz, particle size.

*Cursive*, globulin group to which the marker belongs.

\*Method of measuring the marker, clinical test.

<sup>1</sup>The proposed panel of 287 cancer-associated inflammatory biomarkers could be modified and upgraded over time in accordance with clinical efficacy tested and promising clinical results of novel candidates.

<sup>2</sup> Novel combined systemic inflammation-based scoring systems proposed in further research will be incorporated into the panel.

Table S4

**Search strategy for Pubmed-Medline**

Key:

mh = Medical Subject Heading (MeSH) terms

mh:noexp = MeSH terms:no explode

tiab = title/abstract

\* = truncation

| Search                                              | Query                                                                                                                                                                                                                                                                                                                                                                                                                                                        |
|-----------------------------------------------------|--------------------------------------------------------------------------------------------------------------------------------------------------------------------------------------------------------------------------------------------------------------------------------------------------------------------------------------------------------------------------------------------------------------------------------------------------------------|
| <b>Home built environment</b>                       |                                                                                                                                                                                                                                                                                                                                                                                                                                                              |
| #1                                                  | ((((((((((((((housing[mh])) OR (built environment[mh])) OR (home environment[mh])) OR (built environment[tiab])) OR (hous*[tiab])) OR (home[tiab])) OR (homes[tiab])) OR (domestic[tiab])) OR (indoor[tiab])) OR (interior[tiab])) OR (residential building*[tiab])) OR (apartment*[tiab])) OR (dwelling*[tiab])) OR (flat[tiab])) OR (flats[tiab])) OR (tower block*[tiab])) OR (high rise building*[tiab])) OR (residential[tiab])) OR (residence*[tiab])) |
| <b>Environmental parameters</b>                     |                                                                                                                                                                                                                                                                                                                                                                                                                                                              |
| #2                                                  | (((((air pollution, indoor[mh]) OR (air pollutants[mh])) OR (air pollut*[tiab])) OR (air quality[tiab])) OR (air contamin*[tiab])) OR (aerosols[mh])) OR (aerosol*[tiab]))                                                                                                                                                                                                                                                                                   |
| #3                                                  | ((particulate matter[mh]) OR (particulate matter[tiab])) OR (particle*[tiab]))                                                                                                                                                                                                                                                                                                                                                                               |
| #4                                                  | ((((((((((((((carbon monoxide[mh]) OR (carbon monoxide[tiab])) OR (carbon dioxide[mh])) OR (carbon dioxide[tiab])) OR (nitrogen dioxide[mh])) OR (nitrogen dioxide[tiab])) OR (nitrogen oxides[mh])) OR (nitrogen oxides[tiab])) OR (nitrous acid[mh])) OR (nitrous acid[tiab])) OR (sulfur dioxide[mh])) OR (sulfur dioxide[tiab])) OR (sulphur dioxide[tiab])) OR (ozone[mh]) OR (ozone[tiab]) OR (radon[mh])) OR (radon[tiab]))                           |
| #5                                                  | ((((((((((((((volatile organic compounds[mh]) OR (volatile organic compound*[tiab])) OR (semivolatile organic compound*[tiab])) OR (formaldehyde[mh])) OR (formaldehyde*[tiab])) OR (polycyclic aromatic hydrocarbons[mh])) OR (polycyclic aromatic hydrocarbon*[tiab])) OR (phthalic acids[mh])) OR (phthalic acid*[tiab])) OR (phthalate*[tiab])) OR (aldehydes[mh])) OR (aldehyde*[tiab])) OR (methamphetamine[mh])) OR (methamphetamine[tiab]))          |
| #6                                                  | ((((((((((((((air microbiology[mh]) OR (bioaerosol*[tiab])) OR (fungi[mh])) OR (fungi[tiab])) OR (microbiome*[tiab])) OR (microbial[tiab])) OR (microorganism*[tiab])) OR (allergens, house dust mites[mh])) OR (dust[tiab])) OR (organic contamin*[tiab])) OR (mold[tiab])) OR (mould[tiab])) OR (moldy[tiab])) OR (mouldy[tiab])) OR (moisture[tiab])) OR (bacteria[mh])) OR (bacteria[tiab]))                                                             |
| #7                                                  | ((((((((((((((ventilation[mh]) OR (ventilation[tiab])) OR (air conditioning[mh])) OR (air condition*[tiab])) OR (air filters[mh])) OR (air filter*[tiab])) OR (air filtration[tiab])) OR (air purifier*[tiab])) OR (high efficiency particulate air[tiab])) OR (HEPA[tiab])) OR (heating[mh])) OR (HVAC[tiab])) OR (insulat*[tiab])) OR (air-change*[tiab])) OR (air exchange*[tiab]))                                                                       |
| #8                                                  | (((((temperature[mh]) OR (temperature*[tiab])) OR (thermal comfort[tiab])) OR (thermal condition*[tiab])) OR (thermal insulation[tiab])) OR (warmth[tiab])) OR (heat*[tiab]))                                                                                                                                                                                                                                                                                |
| #9                                                  | ((((((((((lighting[mh]) OR (light*[tiab])) OR (photoperiod[mh])) OR (photoperiod*[tiab])) OR (illumination[tiab])) OR (illuminance[tiab])) OR (daylight*[tiab])) OR (sunlight*[tiab])) OR (nightlight*[tiab])) OR (light at night[tiab]))                                                                                                                                                                                                                    |
| #10                                                 | ((((((((((radiation, nonionizing[mh]) OR (electromagnetic fields[mh])) OR (electromagnetic field*[tiab])) OR (electromagnetic phenomena[mh:noexp])) OR (electromagnetic radiation[tiab])) OR (radiation monitoring[mh])) OR (radio-frequency*[tiab])) OR (radiofrequency*[tiab])) OR (microwave*[tiab])) OR (electric field*[tiab])) OR (magnetic field*[tiab])) OR (electricity[mh]) OR (electric*[tiab]))                                                  |
| #11                                                 | (((((acoustics[mh])) OR (acoustic*[tiab])) OR (sound[mh])) OR (sound*[tiab])) OR (noise[tiab]))                                                                                                                                                                                                                                                                                                                                                              |
| #12                                                 | ((((((((((nature[tiab]) OR (natural[tiab])) OR (green*[tiab])) OR (greenspace*[tiab])) OR ("blue space"*[tiab])) OR (garden*[tiab])) OR (plant*[tiab])) OR (houseplant*[tiab])) OR (vegetation[tiab]))                                                                                                                                                                                                                                                       |
| #13                                                 | (((((water[mh]) OR (water[tiab])) OR (drinking water[mh])) OR (water quality[mh]))                                                                                                                                                                                                                                                                                                                                                                           |
| #14                                                 | #2 OR #3 OR #4 OR #5 OR #6 OR...#13                                                                                                                                                                                                                                                                                                                                                                                                                          |
| <b>Biomarkers of systemic inflammatory response</b> |                                                                                                                                                                                                                                                                                                                                                                                                                                                              |
| #15                                                 | ((((((((((biomarker*[tiab]) OR (marker*[tiab])) OR (indicator*[tiab])) OR (mediator*[tiab])) OR (profile*[tiab])) OR (score*[tiab])) OR (index*[tiab])) AND (((inflammat*[tiab]) OR (immun*[tiab])) OR (lipid*[tiab])) OR (metabolic[tiab])) OR (endocrine[tiab])) OR (biomarkers[mh:noexp])) OR (inflammation[mh:noexp]))                                                                                                                                   |



|     |                                                                                                                                                                                                                                                                                                                                                                                                                                                                                                                                                                                                                                                                                                                                                                                                                                                                                                                                                                                                                                             |
|-----|---------------------------------------------------------------------------------------------------------------------------------------------------------------------------------------------------------------------------------------------------------------------------------------------------------------------------------------------------------------------------------------------------------------------------------------------------------------------------------------------------------------------------------------------------------------------------------------------------------------------------------------------------------------------------------------------------------------------------------------------------------------------------------------------------------------------------------------------------------------------------------------------------------------------------------------------------------------------------------------------------------------------------------------------|
| #16 | (((((((((cytokines[mh]) OR (cytokine*[tiab]) OR (interleukin*[tiab]) OR (leukemia inhibitory factor[tiab])) OR (oncostatin[tiab])) OR (cardiotrophin[tiab]) OR (ciliary neurotrophic factor[tiab])) OR (colony stimulating factor*[tiab]) OR (erythropoietin[tiab]) OR (hematopoietin[tiab]))                                                                                                                                                                                                                                                                                                                                                                                                                                                                                                                                                                                                                                                                                                                                               |
| #17 | ((((((((((((adipokines[mh]) OR (adipokine*[tiab]) OR (adipocytokine*[tiab]) OR (adipocytes[mh])) OR (adipocyte*[tiab]) OR(adiponectin*[tiab]) OR (leptin[tiab]) OR (receptors, leptin[mh])) OR (resistin[tiab]) OR (adipose tissue-specific secretory factor[tiab])) OR (visfatin[tiab]))                                                                                                                                                                                                                                                                                                                                                                                                                                                                                                                                                                                                                                                                                                                                                   |
| #18 | ((((((((chemokine*[tiab]) OR (receptors, chemokine[mh])) OR (interferon*[tiab]) OR (tumor necrosis factor*[tiab]) OR (macrophage migration-inhibitory factor*[tiab]) OR (glycosylation-inhibiting factor[tiab]))                                                                                                                                                                                                                                                                                                                                                                                                                                                                                                                                                                                                                                                                                                                                                                                                                            |
| #19 | ((((((((((((((transforming growth factor beta[tiab]) OR (angiogenic proteins[mh]) OR (vascular endothelial growth factor*[tiab]) OR (platelet-derived growth factor[MeSH Terms:noexp])) OR (platelet-derived growth factor[tiab]) OR (fibroblast growth factors[mh]) OR (fibroblast growth factor*[tiab]) OR (epidermal growth factor[mh]) OR (epidermal growth factor[tiab]) OR (placenta growth factor[tiab]) OR(hepatocyte growth factor[tiab]) OR (nerve growth factor[mh]) OR (nerve growth factor[tiab]))                                                                                                                                                                                                                                                                                                                                                                                                                                                                                                                             |
| #20 | (((((insulin[mh]) OR (insulin[tiab]) OR (endothelins[mh]) OR (endothelin*[tiab]) OR (angiotensins[mh])) OR (angiotensin*[tiab]) OR (angiopoietin*[tiab]))                                                                                                                                                                                                                                                                                                                                                                                                                                                                                                                                                                                                                                                                                                                                                                                                                                                                                   |
| #21 | ((((((((NF-kappa B[mh]) OR (NF-kappa B[tiab]) OR (nuclear factor kappa B[tiab]) OR (nuclear factor erythroid[tiab]) OR (STAT transcription factors[mh])) OR (STAT[tiab]) OR(hypoxia-inducible factor[mh]) OR(hypoxia-inducible factor[tiab]))                                                                                                                                                                                                                                                                                                                                                                                                                                                                                                                                                                                                                                                                                                                                                                                               |
| #22 | (((((((((serum globulins[MeSH Terms]) OR (globulin*[Title/Abstract]) OR (immunoglobulin*[Title/Abstract]) OR (cell adhesion molecules[MeSH Terms:noexp])) OR (cell adhesion molecule*[Title/Abstract]) OR (selectins[MeSH Terms])) OR (selectin*[Title/Abstract]) OR (endothelial-leukocyte adhesion molecule[Title/Abstract]) OR (programmed cell death protein*[Title/Abstract]))                                                                                                                                                                                                                                                                                                                                                                                                                                                                                                                                                                                                                                                         |
| #23 | ((((((((((((eicosanoids[mh]) OR (eicosanoid*[tiab]) OR (prostanoid*[tiab]) OR (cyclooxygenase*[tiab]) OR (cyclo-oxygenase*[tiab]) OR (prostaglandin-endoperoxide synthases[mh]) OR (prostaglandin[tiab]) OR (thromboxane*[tiab]) OR (lipoxygenases[mh])) OR (lipoxygenase*[tiab]) OR (lipo-oxygenase*[tiab]) OR (leukotriene*[tiab]) OR (lipoxin*[tiab]))                                                                                                                                                                                                                                                                                                                                                                                                                                                                                                                                                                                                                                                                                   |
| #24 | ((((((((((((((((((((((((((((((((((((((acute phase proteins[mh]) OR (acute-phase protein*[tiab]) OR (acute phase reactant*[tiab]) OR (C-reactive protein*[tiab]) OR (pentraxin*[tiab]) OR (serum amyloid[tiab]) OR (acid glycoprotein[tiab]) OR (orosomucoid[tiab]) OR (antitrypsin[tiab]) OR (serpin[tiab]) OR (extracellular matrix proteins[mh:noexp])) OR (extracellular matrix protein*[tiab]) OR (fibronectin[tiab]) OR (ferritins[mh:noexp])) OR (ferritin*[tiab]) OR (osteopontin[tiab]) OR (vitronectin[tiab]) OR (fibrinogen[tiab]) OR (D-dimer[tiab]) OR (thrombin[mh]) OR (thrombin[tiab]) OR (fibrinolysin[mh]) OR (fibrinolysin[tiab]) OR (plasmin[tiab]) OR (plasminogen[tiab]) OR (macroglobulin*[tiab]) OR (ceruloplasmin[tiab]) OR (caeruloplasmin[tiab]) OR (haptoglobin*[tiab]) OR (hemopexin[tiab]) OR (haemopexin[tiab]) OR (microglobulin*[tiab]) OR (complement system proteins[mh]) OR (complement system protein*[tiab]) OR (serum albumin[mh]) OR (albumin[tiab]) OR (transferrin*[tiab]) OR (prealbumin*[tiab])) |
| #25 | ((((((((((((((((hemoglobins[mh]) OR (hemoglobin*[tiab]) OR (haemoglobin*[tiab]) OR (glycohemoglobin[tiab]) OR (cell-free heme[tiab]) OR (vitamin D[mh]) OR (vitamin D[tiab]) OR (25-hydroxyvitamin D[tiab]) OR (25-hydroxyvitamin D3 1-alpha-hydroxylase*[tiab]) OR (25-hydroxyvitamin D3 1- $\alpha$ -hydroxylase*[tiab]) OR (1,25-dihydroxyvitamin D[tiab]) OR (hydroxycholecalciferol[tiab]) OR (calcidiol[tiab]) OR (calcitriol[tiab]) OR (matrix metalloproteinases, secreted[mh]) OR (matrix metalloproteinase*[tiab]))                                                                                                                                                                                                                                                                                                                                                                                                                                                                                                               |
| #26 | (((((lipoproteins[mh]) OR (lipoprotein*[tiab]) OR (apolipoprotein*[tiab]) OR (cholesterol[tiab]) OR (triglycerides[mh]) OR (triglyceride*[tiab]))                                                                                                                                                                                                                                                                                                                                                                                                                                                                                                                                                                                                                                                                                                                                                                                                                                                                                           |
| #27 | ((((((((((((((((((glucocorticoids[mh]) OR (glucocorticoid*[ tiab]) OR (cortisone[mh]) OR (cortisone[tiab]) OR (cortisol[tiab]) OR (corticotropin-releasing hormone[tiab]) OR (adrenocorticotrophic hormone[tiab]) OR (gamma-aminobutyric acid[mh:noexp])) OR (gamma aminobutyric acid[tiab]) OR (serotonin[mh]) OR (serotonin[tiab]) OR (5-hydroxytryptamine[tiab]) OR (dopamine[mh]) OR (epinephrine[mh]) OR (norepinephrine[mh]) OR (catecholamine*[tiab]) OR (epinephrine[tiab]) OR (adrenaline[tiab]) OR (norepinephrine[tiab]) OR (dopamine[tiab]) OR (melatonin[mh]) OR (melatonin[tiab]) OR (6-sulfatoxymelatonin[tiab]))                                                                                                                                                                                                                                                                                                                                                                                                            |
| #28 | ((((((((((((blood cell count[mh]) OR (blood cell count[tiab]) OR (blood platelets[mh]) OR (thrombocyte*[tiab]) OR (platelet*[tiab]) OR (erythrocytes[mh]) OR (erythrocyte*[tiab]) OR (red blood cell*[tiab]) OR (red blood cell distribution width[tiab]) OR (red cell distribution                                                                                                                                                                                                                                                                                                                                                                                                                                                                                                                                                                                                                                                                                                                                                         |

|     |                                                                                                                                                                                                                                                                                                                                                                                                    |
|-----|----------------------------------------------------------------------------------------------------------------------------------------------------------------------------------------------------------------------------------------------------------------------------------------------------------------------------------------------------------------------------------------------------|
|     | width[tiab])) OR (blood sedimentation[tiab])) OR (erythrocyte sedimentation rate[tiab])) OR(hemorheology[mh])) OR (blood viscosity[tiab])) OR (plasma viscosity[tiab]))                                                                                                                                                                                                                            |
| #29 | ((((((((((((leukocytes[mh]) OR (leukocyte*[tiab])) OR (white blood cell*[tiab])) OR (white cell count[tiab])) OR (macrophages[mh])) OR (macrophage*[tiab])) OR (monocyte*[tiab])) OR (neutrophil*[tiab])) OR (lymphocyte*[tiab])) OR (regulatory T-cell*[tiab]) OR (Tregs count[tiab])) OR (Treg count[tiab])) OR (CD4 count[tiab])) OR (T-cell count[tiab])) OR (circulating plasma cell*[tiab])) |
| #30 | #15 OR #16 OR #17 OR #18 OR #19 OR...#29                                                                                                                                                                                                                                                                                                                                                           |
| #31 | #1 AND #14 AND #30                                                                                                                                                                                                                                                                                                                                                                                 |
| #32 | #31 NOT (animals[mh] NOT humans[mh])                                                                                                                                                                                                                                                                                                                                                               |

**Table S5****Variables collected in pre-established data extraction template.**

| <b>Construct</b>                                       | <b>Variables</b>                                                                                                                                                                                                                                                                                                                                            |
|--------------------------------------------------------|-------------------------------------------------------------------------------------------------------------------------------------------------------------------------------------------------------------------------------------------------------------------------------------------------------------------------------------------------------------|
| (A) Study information                                  | <ul style="list-style-type: none"> <li>• First author's last name, publication year</li> <li>• Study design</li> <li>• Journal name</li> <li>• Geographical region in which the study was conducted</li> <li>• Duration of follow-up or study period</li> <li>• Aims and/or purpose of the study</li> </ul>                                                 |
| (B) participant, patient characteristics               | <ul style="list-style-type: none"> <li>• Sample size</li> <li>• Gender composition</li> <li>• Mean or median age</li> <li>• Ethnicity</li> <li>• Socio-economic status (if available)</li> </ul>                                                                                                                                                            |
| (C) clinicopathological characteristics (if available) | <ul style="list-style-type: none"> <li>• Comorbidities: medical classification topography code, collection method, measure of association<sup>1</sup></li> <li>• Baseline clinical parameters</li> <li>• Body mass index</li> <li>• Prescribed medications</li> </ul>                                                                                       |
| (D) Home built environment intervention                | <ul style="list-style-type: none"> <li>• Device(s), technology and/or architecture element(s) information</li> <li>• Technical specifications</li> <li>• Duration of treatment period</li> <li>• Timing, delivery</li> <li>• Co-interventions</li> <li>• Economic information</li> </ul>                                                                    |
| (E) improved/modified environmental factor             | <ul style="list-style-type: none"> <li>• Parameter type within categories (i.e., pollutants)</li> <li>• Sources</li> <li>• Exposure levels</li> <li>• Method(s) of measurement</li> <li>• Equipment</li> <li>• Measurements: dose, duration, intensity, frequency</li> </ul>                                                                                |
| (F) Housing characteristics and design (if reported)   | <ul style="list-style-type: none"> <li>• Study setting</li> <li>• Housing typology</li> <li>• Residence type</li> <li>• Building age</li> <li>• Material specification</li> <li>• Spatial characteristics</li> <li>• Engineering systems</li> </ul>                                                                                                         |
| (G) Inflammatory biomarker data                        | <ul style="list-style-type: none"> <li>• Sample types</li> <li>• Laboratory assay methods</li> <li>• Cut-offs, midpoints to report up- or down-regulation and to distinguish marker levels from unresolved to resolving outcomes</li> <li>• Concentration level for each marker (pre- and post-intervention; repeated over intervention period).</li> </ul> |
| (H) Outcomes                                           | <ul style="list-style-type: none"> <li>• Analysis models</li> <li>• Effect estimates</li> <li>• Adjusted potential confounders</li> </ul>                                                                                                                                                                                                                   |
| (I) Plausible mechanistic pathways <sup>2</sup>        | <ul style="list-style-type: none"> <li>• Initiating event(s)</li> <li>• Key events (e.g., cellular/tissue/system responses)</li> <li>• Adverse outcome(s)</li> </ul>                                                                                                                                                                                        |

<sup>1</sup> International Classification of Diseases (ICD-11) to group reported medical conditions. However, adjust of terms to the International Classification of Primary Care, 3<sup>rd</sup> edition (ICPC-3) into WHO Family of International Classifications (FIC) [<https://browser.icpc-3.info/>] will be performed to classify the clinicopathological characteristics and patient and clinical data in the domains of General/Family Practice and Primary Care. <sup>2</sup> The plausible mechanistic pathways will be organised and structured according to the Adverse Outcome Pathway (AOP) framework.
